# Supplementary material for: The Pan-Arctic Catchment Database (ARCADE)
Source: Copernicus journal article supplement (doi:10.5194/essd-2022-269), 2022-09-15
Supplement: Supplementary file 1 [file Speetjens_et_al_2022_ESSD_S1.xlsx]

## Sheet: Categories
Rank	Category	Variable cluster	Number of columns
1	Index	-	2
2	Terrain	Landform (Theobald, 2015)	15
2	Terrain	Basic terrain properties	31	46
3	Soil	Soil type	23
3	Soil	Permafrost	27
3	Soil	Soil properties	192
3	Soil	Organic carbon stocks	6	248
4	Landcover	NDVI + trends	8
4	Landcover	ESA10m landcover classes	11
4	Landcover	TCVIS trend	15	34
5	Climate	ERA 5-land snow	4
5	Climate	ERA 5-land annual climate means	7
5	Climate	ERA 1990-2019 trend	14	25
total			353

## Sheet: All columns
	category	column name
2	Basic properties	aspect	1
3	Basic properties	slope	2
5	Basic properties	area_km2	3
45	Basic properties	zmin	4
46	Basic properties	zmax
47	Basic properties	zmean
48	Basic properties	zstd
49	Basic properties	zmed
50	Basic properties	water_frac	5
51	Basic properties	land_frac	6
95	Basic properties	frac_burn	7
112	Basic properties	frac_ice	8
118	Basic properties	twi_min	9
119	Basic properties	twi_max
120	Basic properties	twi_mean
121	Basic properties	twi_std
122	Basic properties	twi_med
123	Basic properties	perimeter
124	Basic properties	gravelius
125	Basic properties	LS_min
126	Basic properties	LS_max
127	Basic properties	LS_mean
128	Basic properties	LS_std
129	Basic properties	LS_med
130	Basic properties	cslope_min
131	Basic properties	cslope_max
132	Basic properties	cslope_mea
133	Basic properties	cslope_std
134	Basic properties	cslope_med
170	Basic properties	continent
186	Basic properties	area_division
171	ERA 5-land annual means	t_2m_max
172	ERA 5-land annual means	t_2m_mean
173	ERA 5-land annual means	t_2m_min
174	ERA 5-land annual means	runoff_mea
175	ERA 5-land annual means	etot_mean
176	ERA 5-land annual means	ptot_mean
177	ERA 5-land annual means	total_prec
178	ERA 5-land snow	snowc_max
179	ERA 5-land snow	snowd_max
180	ERA 5-land snow	snowf_max
181	ERA 5-land snow	snowm_max
81	ERA trend	s_epot
82	ERA trend	s_etot
83	ERA trend	s_lai_hi
84	ERA trend	s_lai_lo
85	ERA trend	s_runoff
86	ERA trend	s_snowcove
87	ERA trend	s_snowdept
88	ERA trend	s_snowmelt
89	ERA trend	s_soiltem1
90	ERA trend	s_soiltem2
91	ERA trend	s_soiltem3
92	ERA trend	s_soiltem4
93	ERA trend	s_temp_2m
94	ERA trend	s_totprec
159	ESA10mLandcover	lc_10
160	ESA10mLandcover	lc_20
161	ESA10mLandcover	lc_30
162	ESA10mLandcover	lc_40
163	ESA10mLandcover	lc_50
164	ESA10mLandcover	lc_60
165	ESA10mLandcover	lc_70
166	ESA10mLandcover	lc_80
167	ESA10mLandcover	lc_90
168	ESA10mLandcover	lc_95
169	ESA10mLandcover	lc_100
0	Index	index
1	Index	gid
30	Landform (Theobald, 2015)	terrain_0
31	Landform (Theobald, 2015)	terrain_1
32	Landform (Theobald, 2015)	terrain_2
33	Landform (Theobald, 2015)	terrain_3
34	Landform (Theobald, 2015)	terrain_4
35	Landform (Theobald, 2015)	terrain_5
36	Landform (Theobald, 2015)	terrain_6
37	Landform (Theobald, 2015)	terrain_7
38	Landform (Theobald, 2015)	terrain_8
39	Landform (Theobald, 2015)	terrain_9
40	Landform (Theobald, 2015)	terrain_10
41	Landform (Theobald, 2015)	terrain_11
42	Landform (Theobald, 2015)	terrain_12
43	Landform (Theobald, 2015)	terrain_13
44	Landform (Theobald, 2015)	terrain_14
135	NDVI	NDVI_max
136	NDVI	NDVI_mean
137	NDVI	NDVI_min
138	NDVI	NDVI_stdDe
139	NDVI	sNDVI_max
140	NDVI	sNDVI_mean
141	NDVI	sNDVI_min
142	NDVI	sNDVI_std
76	Organic carbon stocks	ocs_max
77	Organic carbon stocks	ocs_mean
78	Organic carbon stocks	ocs_min
79	Organic carbon stocks	ocs_std
80	Organic carbon stocks	oc_tot
111	Organic carbon stocks	ocs_med
4	Permafrost	pf_frac
6	Permafrost	iwp_frac
113	Permafrost	alt_max
114	Permafrost	alt_mean
115	Permafrost	alt_median
116	Permafrost	alt_min
117	Permafrost	alt_std
143	Permafrost	gt_1_max
144	Permafrost	gt_1_mean
145	Permafrost	gt_1_min
146	Permafrost	gt_1_std
147	Permafrost	gt_2_max
148	Permafrost	gt_2_mean
149	Permafrost	gt_2_min
150	Permafrost	gt_2_std
151	Permafrost	gt_3_max
152	Permafrost	gt_3_mean
153	Permafrost	gt_3_min
154	Permafrost	gt_3_std
155	Permafrost	gt_4_max
156	Permafrost	gt_4_mean
157	Permafrost	gt_4_min
158	Permafrost	gt_4_std
182	Permafrost	pf_cont
183	Permafrost	pf_disc
184	Permafrost	pf_isol
185	Permafrost	pf_spor
52	Soil properties	soc_1_max
53	Soil properties	soc_1_mean
54	Soil properties	soc_1_min
55	Soil properties	soc_1_std
56	Soil properties	soc_2_max
57	Soil properties	soc_2_mean
58	Soil properties	soc_2_min
59	Soil properties	soc_2_std
60	Soil properties	soc_3_max
61	Soil properties	soc_3_mean
62	Soil properties	soc_3_min
63	Soil properties	soc_3_std
64	Soil properties	soc_4_max
65	Soil properties	soc_4_mean
66	Soil properties	soc_4_min
67	Soil properties	soc_4_std
68	Soil properties	soc_5_max
69	Soil properties	soc_5_mean
70	Soil properties	soc_5_min
71	Soil properties	soc_5_std
72	Soil properties	soc_6_max
73	Soil properties	soc_6_mean
74	Soil properties	soc_6_min
75	Soil properties	soc_6_std
7	Soil type	soilt_23
8	Soil type	soilt_24
9	Soil type	soilt_25
10	Soil type	soilt_26
11	Soil type	soilt_27
12	Soil type	soilt_28
13	Soil type	soilt_29
14	Soil type	soilt_11
15	Soil type	soilt_12
16	Soil type	soilt_13
17	Soil type	soilt_14
18	Soil type	soilt_15
19	Soil type	soilt_16
20	Soil type	soilt_18
21	Soil type	soilt_1
22	Soil type	soilt_3
23	Soil type	soilt_4
24	Soil type	soilt_5
25	Soil type	soilt_6
26	Soil type	soilt_7
27	Soil type	soilt_8
28	Soil type	soilt_20
29	Soil type	soilt_21
96	TCVIS trend	s_TCB_max
97	TCVIS trend	s_TCB_mean
98	TCVIS trend	s_TCB_med
99	TCVIS trend	s_TCB_min
100	TCVIS trend	s_TCB_std
101	TCVIS trend	s_TCG_max
102	TCVIS trend	s_TCG_mean
103	TCVIS trend	s_TCG_med
104	TCVIS trend	s_TCG_min
105	TCVIS trend	s_TCG_std
106	TCVIS trend	s_TCW_max
107	TCVIS trend	s_TCW_mean
108	TCVIS trend	s_TCW_med
109	TCVIS trend	s_TCW_min
110	TCVIS trend	s_TCW_std
111	Soil properties	bdod_1_max
112	Soil properties	bdod_1_mea
113	Soil properties	bdod_1_min
114	Soil properties	bdod_1_std
115	Soil properties	bdod_2_max
116	Soil properties	bdod_2_mea
117	Soil properties	bdod_2_min
118	Soil properties	bdod_2_std
119	Soil properties	bdod_3_max
120	Soil properties	bdod_3_mea
121	Soil properties	bdod_3_min
122	Soil properties	bdod_3_std
123	Soil properties	bdod_4_max
124	Soil properties	bdod_4_mea
125	Soil properties	bdod_4_min
126	Soil properties	bdod_4_std
127	Soil properties	bdod_5_max
128	Soil properties	bdod_5_mea
129	Soil properties	bdod_5_min
130	Soil properties	bdod_5_std
131	Soil properties	bdod_6_max
132	Soil properties	bdod_6_mea
133	Soil properties	bdod_6_min
134	Soil properties	bdod_6_std
135	Soil properties	cfvo_1_max
136	Soil properties	cfvo_1_mea
137	Soil properties	cfvo_1_min
138	Soil properties	cfvo_1_std
139	Soil properties	cfvo_2_max
140	Soil properties	cfvo_2_mea
141	Soil properties	cfvo_2_min
142	Soil properties	cfvo_2_std
143	Soil properties	cfvo_3_max
144	Soil properties	cfvo_3_mea
145	Soil properties	cfvo_3_min
146	Soil properties	cfvo_3_std
147	Soil properties	cfvo_4_max
148	Soil properties	cfvo_4_mea
149	Soil properties	cfvo_4_min
150	Soil properties	cfvo_4_std
151	Soil properties	cfvo_5_max
152	Soil properties	cfvo_5_mea
153	Soil properties	cfvo_5_min
154	Soil properties	cfvo_5_std
155	Soil properties	cfvo_6_max
156	Soil properties	cfvo_6_mea
157	Soil properties	cfvo_6_min
158	Soil properties	cfvo_6_std
159	Soil properties	ocd_1_max
160	Soil properties	ocd_1_mean
161	Soil properties	ocd_1_min
162	Soil properties	ocd_1_std
163	Soil properties	ocd_2_max
164	Soil properties	ocd_2_mean
165	Soil properties	ocd_2_min
166	Soil properties	ocd_2_std
167	Soil properties	ocd_3_max
168	Soil properties	ocd_3_mean
169	Soil properties	ocd_3_min
170	Soil properties	ocd_3_std
171	Soil properties	ocd_4_max
172	Soil properties	ocd_4_mean
173	Soil properties	ocd_4_min
174	Soil properties	ocd_4_std
175	Soil properties	ocd_5_max
176	Soil properties	ocd_5_mean
177	Soil properties	ocd_5_min
178	Soil properties	ocd_5_std
179	Soil properties	ocd_6_max
180	Soil properties	ocd_6_mean
181	Soil properties	ocd_6_min
182	Soil properties	ocd_6_std
183	Soil properties	sand_1_max
184	Soil properties	sand_1_mea
185	Soil properties	sand_1_min
186	Soil properties	sand_1_std
187	Soil properties	sand_2_max
188	Soil properties	sand_2_mea
189	Soil properties	sand_2_min
190	Soil properties	sand_2_std
191	Soil properties	sand_3_max
192	Soil properties	sand_3_mea
193	Soil properties	sand_3_min
194	Soil properties	sand_3_std
195	Soil properties	sand_4_max
196	Soil properties	sand_4_mea
197	Soil properties	sand_4_min
198	Soil properties	sand_4_std
199	Soil properties	sand_5_max
200	Soil properties	sand_5_mea
201	Soil properties	sand_5_min
202	Soil properties	sand_5_std
203	Soil properties	sand_6_max
204	Soil properties	sand_6_mea
205	Soil properties	sand_6_min
206	Soil properties	sand_6_std
207	Soil properties	silt_1_max
208	Soil properties	silt_1_mea
209	Soil properties	silt_1_min
210	Soil properties	silt_1_std
211	Soil properties	silt_2_max
212	Soil properties	silt_2_mea
213	Soil properties	silt_2_min
214	Soil properties	silt_2_std
215	Soil properties	silt_3_max
216	Soil properties	silt_3_mea
217	Soil properties	silt_3_min
218	Soil properties	silt_3_std
219	Soil properties	silt_4_max
220	Soil properties	silt_4_mea
221	Soil properties	silt_4_min
222	Soil properties	silt_4_std
223	Soil properties	silt_5_max
224	Soil properties	silt_5_mea
225	Soil properties	silt_5_min
226	Soil properties	silt_5_std
227	Soil properties	silt_6_max
228	Soil properties	silt_6_mea
229	Soil properties	silt_6_min
230	Soil properties	silt_6_std
231	Soil properties	clay_1_max
232	Soil properties	clay_1_mea
233	Soil properties	clay_1_min
234	Soil properties	clay_1_std
235	Soil properties	clay_2_max
236	Soil properties	clay_2_mea
237	Soil properties	clay_2_min
238	Soil properties	clay_2_std
239	Soil properties	clay_3_max
240	Soil properties	clay_3_mea
241	Soil properties	clay_3_min
242	Soil properties	clay_3_std
243	Soil properties	clay_4_max
244	Soil properties	clay_4_mea
245	Soil properties	clay_4_min
246	Soil properties	clay_4_std
247	Soil properties	clay_5_max
248	Soil properties	clay_5_mea
249	Soil properties	clay_5_min
250	Soil properties	clay_5_std
251	Soil properties	clay_6_max
252	Soil properties	clay_6_mea
253	Soil properties	clay_6_min
254	Soil properties	clay_6_std
255	Soil properties	nitr_1_max
256	Soil properties	nitr_1_mea
257	Soil properties	nitr_1_min
258	Soil properties	nitr_1_std
259	Soil properties	nitr_2_max
260	Soil properties	nitr_2_mea
261	Soil properties	nitr_2_min
262	Soil properties	nitr_2_std
263	Soil properties	nitr_3_max
264	Soil properties	nitr_3_mea
265	Soil properties	nitr_3_min
266	Soil properties	nitr_3_std
267	Soil properties	nitr_4_max
268	Soil properties	nitr_4_mea
269	Soil properties	nitr_4_min
270	Soil properties	nitr_4_std
271	Soil properties	nitr_5_max
272	Soil properties	nitr_5_mea
273	Soil properties	nitr_5_min
274	Soil properties	nitr_5_std
275	Soil properties	nitr_6_max
276	Soil properties	nitr_6_mea
277	Soil properties	nitr_6_min
278	Soil properties	nitr_6_std

## Sheet: Basic properties
label	unit	description
aspect	degrees	Watershed average aspect calculated as the averaged aspect of the 90m-resolution aspect derived from the source DEM
slope	degrees	Watershed slope calculated as the averaged slope of the 90m-resolution slope derived from the source DEM
area_km2	km2	Watershed area
zmin	m	Minimum watershed elevation above mean sea level
zmax	m	Maximum watershed elevation above mean sea level
zmean	m	Mean watershed elevation above mean sea level
zstd	m	Standard deviation of mean watershed elevation above mean sea level
zmed	m	Median watershed elevation above mean sea level
water_frac	km2/km2	Fraction of watershed area covered by surface water
land_frac	km2/km2	Fraction of watershed area covered by land
frac_burn	km2/km2	Fraction of watershed area covered by burn scars younger than 10 years old
frac_ice	km2/km2	Fraction of watershed area covered by glacier ice and/or ice-sheets
twi_min	-	Minimum watershed SAGA topographic wetness index
twi_max	-	Maximum watershed SAGA topographic wetness index
twi_mean	-	Mean watershed SAGA topographic wetness index
twi_std	-	Standard deviation of mean SAGA watershed topographic wetness index
twi_med	-	Median watershed SAGA topographic wetness index
perimeter	km	Perimeter
gravelius	-	Gravelius index
LS_min		Minimum watershed slope length value
LS_max		Maximum watershed slope length value
LS_mean		Mean watershed slope length value
LS_std		Standard deviation of mean watershed slope length value
LS_med		Median watershed slope length value
cslope_min	rad	Minimum catchment slope calculated following SAGA method for SAGA wetness index multiply by (180/pi) for degrees
cslope_max	rad	Maximum catchment slope calculated following SAGA method for SAGA wetness index multiply by (180/pi) for degrees
cslope_mea	rad	Mean catchment slope calculated following SAGA method for SAGA wetness index multiply by (180/pi) for degrees
cslope_std	rad	Standard deviation of mean catchment slope calculated following SAGA method for SAGA wetness index multiply by (180/pi) for degrees
cslope_med	rad	Median catchment slope calculated following SAGA method for SAGA wetness index multiply by (180/pi) for degrees
continent	-	(sub-)continent
area_division	-	label to distinguish between big 6, middle 9, 'thousands' and remainder

## Sheet: TCVIS  trend
label	unit	description
s_TCB_max	-	Maximum Tasseled Cap Browning index slope (change over the period
s_TCB_mean	-	Mean Tasseled Cap Browning index slope (change over the period
s_TCB_med	-	Meadian Tasseled Cap Browning index slope (change over the period
s_TCB_min	-	Minimum Tasseled Cap Browning index slope (change over the period
s_TCB_std	-	Standard deviation of mean Tasseled Cap Browning index slope (change over the period
s_TCG_max	-	Maximum Tasseled Cap Greening index slope (change over the period
s_TCG_mean	-	Mean Tasseled Cap Greening index slope (change over the period
s_TCG_med	-	Meadian Tasseled Cap Greening index slope (change over the period
s_TCG_min	-	Minimum Tasseled Cap Greening index slope (change over the period
s_TCG_std	-	Standard deviation of mean Tasseled Cap Greening index slope (change over the period
s_TCW_max	-	Maximum Tasseled Cap Wettening index slope (change over the period
s_TCW_mean	-	Mean Tasseled Cap Wettening index slope (change over the period
s_TCW_med	-	Meadian Tasseled Cap Wettening index slope (change over the period
s_TCW_min	-	Minimum Tasseled Cap Wettening index slope (change over the period
s_TCW_std	-	Standard deviation of mean Tasseled Cap Wettening index slope (change over the period

## Sheet: Permafrost
label	unit	description
﻿pf_cont	km2/km2	fraction of watershed area underlain by continuous permafrost (>90%)
pf_disc	km2/km2	fraction of watershed area underlain by discontinuous permafrost (50% - 90%)
pf_isol	km2/km2	fraction of watershed area underlain by isolated permafrost (10% - 50%)
pf_spor	km2/km2	fraction of watershed area underlain by sporadic permafrost (<10%)
iwp_frac	km2/km2	fraction of watershed area covered by ice wedge polygon terrain
pf_frac	km2/km2	Fraction permafrost coverage
alt_max	cm	Max. active layer thickness
alt_mean	cm	Mean active layer thickness
alt_median	cm	Median active layer thickness
alt_min	cm	Min. active layer thickness
alt_std	cm	Standard deviation of mean active layer thickness
gt_1_max	K	30y catchment maximum ERA5-Land Temperature of the soil in layer 1 (0 - 7 cm) of the ECMWF Integrated Forecasting System. The surface is at 0 cm. Soil temperature is set at the middle of each layer, and heat transfer is calculated at the interfaces between them. It is assumed that there is no heat transfer out of the bottom of the lowest layer.
gt_1_mean	K	30y catchment mean ERA5-Land Temperature of the soil in layer 1 (0 - 7 cm) of the ECMWF Integrated Forecasting System. The surface is at 0 cm. Soil temperature is set at the middle of each layer, and heat transfer is calculated at the interfaces between them. It is assumed that there is no heat transfer out of the bottom of the lowest layer.
gt_1_min	K	30y catchment minimum ERA5-Land Temperature of the soil in layer 1 (0 - 7 cm) of the ECMWF Integrated Forecasting System. The surface is at 0 cm. Soil temperature is set at the middle of each layer, and heat transfer is calculated at the interfaces between them. It is assumed that there is no heat transfer out of the bottom of the lowest layer.
gt_1_std	K	standard deviation of 30y catchment mean ERA5-Land Temperature of the soil in layer 2 (7-28 cm) of the ECMWF Integrated Forecasting System.
gt_2_max	K	30y catchment maximum ERA5-Land Temperature of the soil in layer 2 (7-28 cm) of the ECMWF Integrated Forecasting System.
gt_2_mean	K	30y catchment mean ERA5-Land Temperature of the soil in layer 2 (7-28 cm) of the ECMWF Integrated Forecasting System.
gt_2_min	K	30y catchment minimum ERA5-Land Temperature of the soil in layer 2 (7-28 cm) of the ECMWF Integrated Forecasting System.
gt_2_std	K	standard deviation of 30y catchment mean ERA5-Land Temperature of the soil in layer 2 (7-28 cm) of the ECMWF Integrated Forecasting System.
gt_3_max	K	30y catchment maximum ERA5-Land Temperature of the soil in layer 3 (28-100 cm) of the ECMWF Integrated Forecasting System.
gt_3_mean	K	30y catchment mean ERA5-Land Temperature of the soil in layer 3 (28-100 cm) of the ECMWF Integrated Forecasting System.
gt_3_min	K	30y catchment minimum ERA5-Land Temperature of the soil in layer 3 (28-100 cm) of the ECMWF Integrated Forecasting System.
gt_3_std	K	standard deviation of 30y catchment mean ERA5-Land Temperature of the soil in layer 3 (28-100 cm) of the ECMWF Integrated Forecasting System.
gt_4_max	K	30y catchment maximum ERA5-Land Temperature of the soil in layer 4 (100-289 cm) of the ECMWF Integrated Forecasting System.
gt_4_mean	K	30y catchment mean ERA5-Land Temperature of the soil in layer 4 (100-289 cm) of the ECMWF Integrated Forecasting System.
gt_4_min	K	30y catchment minimum ERA5-Land Temperature of the soil in layer 4 (100-289 cm) of the ECMWF Integrated Forecasting System.
gt_4_std	K	standard deviation of 30y catchment mean ERA5-Land Temperature of the soil in layer 4 (100-289 cm) of the ECMWF Integrated Forecasting System.

## Sheet: ESA10mLandcover
value	color	label
10	6400	Trees
20	ffbb22	Shrubland
30	ffff4c	Grassland
40	f096ff	Cropland
50	fa0000	Built-up
60	b4b4b4	Barren / sparse vegetation
70	f0f0f0	Snow and ice
80	0064c8	Open water
90	0096a0	Herbaceous wetland
95	00cf75	Mangroves
100	fae6a0	Moss and lichen

## Sheet: ERA trend
label	unit	description
s_epot	m/d/mo	slope of mean catchment potential evaporation from ERA5-Land monthly data
s_etot	m/d/mo	slope of mean catchment total evaporation from ERA5-Land monthly data
s_lai_hi	-
s_lai_lo	-
s_runoff	m/d/mo	slope of mean catchment runoff from ERA5-Land monthly data
s_snowcove	-	slope of mean catchment snowcover in the months of November - April from ERA5-Land monthly data
s_snowdept	m	slope of mean catchment snow depth in the months of November - April from ERA5-Land monthly data
s_snowmelt	m/d/mo	slope of mean catchment snow melt in the months of November - April from ERA5-Land monthly data
s_soiltem1	K/d/mo	slope of mean catchment soil temperature (0-7cm) from ERA5-Land monthly data
s_soiltem2	K/d/mo	slope of mean catchment soil temperature (7-28cm) from ERA5-Land monthly data
s_soiltem3	K/d/mo	slope of mean catchment soil temperature (28-100cm) from ERA5-Land monthly data
s_soiltem4	K/d/mo	slope of mean catchment soil temperature (100-289cm) from ERA5-Land monthly data
s_temp_2m	K/d/mo	slope of mean catchment surface air temperature at 2m from ERA5-Land monthly data
s_totprec	m/d/mo	slope of mean catchment total precipitation from ERA5-Land monthly data

## Sheet: ERA5-land snow
var	unit	desc.
snowc_max	%	30y averaged maximum annual snowcover
snowd_max	m	30y averaged maximum annual snowdepth
snowm_max	m/d	30y averaged maximum monthly snowmelt (i.e. the average daily snowmelt for the month with highest amount of snow melt for each year averaged over the 30y period)
snowf_max	m/d	30y averaged maximum monthly snowfall (i.e. the average daily snowfall for the month with highest amount of snowfall for each year averaged over the 30y period)
snowday	d	not yet implemented

## Sheet: ERA5-land annual means
var	unit	desc.
t_2m_max	K	Gives the 30y averaged annual monthly maximum temperature
t_2m_mean	K	Gives the 30y average monthly mean based annual mean temperature
t_2m_min	K	Gives the 30y averaged annual monthly minimum temperature
ptot_mean	m	Gives the 30y averaged annual mean total precipitation
etot_mean	m	Gives the 30y averaged annual mean total evaporation (negative value)
runoff_mean	m	Gives the 30y averaged annual mean total runoff
total_prec	m	Gives the 30y averaged annual mean total precipitation from ERA5 instead of ERA5-Land in case the latter is not covering the spatial extent of the watershed

## Sheet: Landform (Theobald, 2015)
value	label
0	Peak/ridge (warm)
1	Peak/ridge (neutral)
2	Peak/ridge (cool)
3	Mountain/divide
4	Cliff
5	Upper slope (warm)
6	Upper slope (neutral)
7	Upper slope (cool)
8	Upper slope (flat)
9	Lower slope (warm)
10	Lower slope (neutral)
11	Lower slope (cool)
12	Lower slope (flat)
13	Valley
14	Valley (narrow)

[truncated: 5 more sheets: Soil type, Soil properties, Organic carbon stocks, NDVI, data sources (in prog.)]
